# Supplementary material for: TGF-β1 stimulates migration of type II endometrial cancer cells by down-regulating PTEN via activation of SMAD and ERK1/2 signaling pathways
Source: PubMed Central journal article supplement (PMC5308649; doi:10.18632/oncotarget.11311), 2016-08-16
Supplement: oncotarget-07-61262-s001.pdf [file oncotarget-07-61262-s001.pdf]

## TGF- $\beta$ 1 stimulates migration of type II endometrial cancer cells by down-regulating PTEN via activation of SMAD and ERK1/2 signaling pathways

### Supplementary Materials

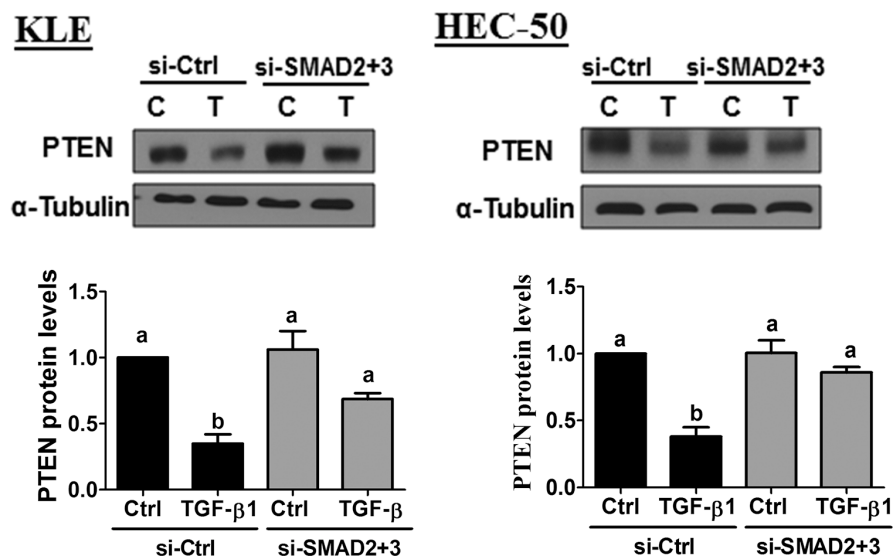

Supplementary Figure S1: KLE and HEC-50 cells were transfected for 48 h with 50 nM control siRNA (si-Ctrl) or combined SMAD2 and SMAD3 siRNA (si-SMAD2+3), treated for a further 24 h without (C) or with 10 ng/mL TGF- $\beta$ 1 (T), and PTEN protein levels were examined by Western blot (normalized to  $\alpha$ -tubulin protein levels). Results are expressed as the mean  $\pm$  SEM of two independent experiments and values without common letters are significantly different ( $P < 0.05$ ).
